# Supplementary material for: Genetic Ancestry-Smoking Interactions and Lung Function in African Americans: A Cohort Study
Source: PubMed Central journal article supplement (PMC3380861; doi:10.1371/journal.pone.0039541), 2012-06-21

**Figure S1. Flow chart of African Americans participating in the Health ABC Study.**

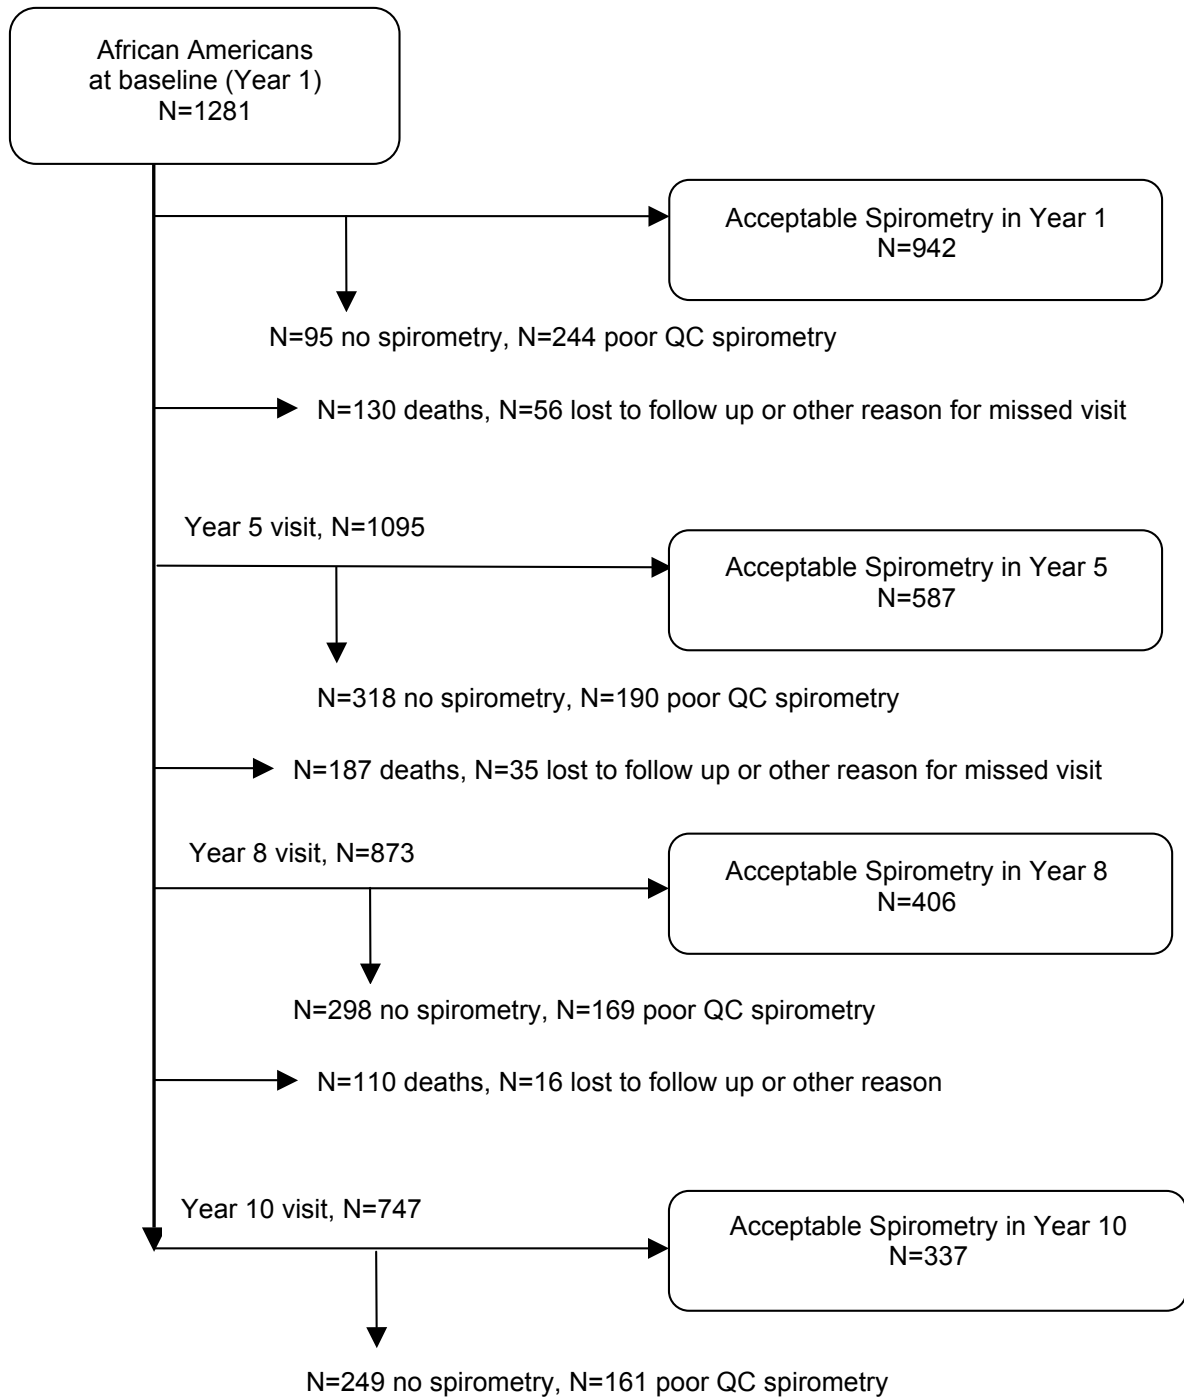

Supplement: pone.0039541.s001.pdf [file pone.0039541.s001.pdf]
