# Supplementary material for: Genetic Ancestry-Smoking Interactions and Lung Function in African Americans: A Cohort Study
Source: PubMed Central journal article supplement (PMC3380861; doi:10.1371/journal.pone.0039541), 2012-06-21
Supplement: pone.0039541.s002.pdf [file pone.0039541.s002.pdf]

**Table S1. Baseline demographic characteristics of 1,223 African Americans participating in the CARDIA study.**

| Characteristic                                | N=1,223<br>N (%) |
|-----------------------------------------------|------------------|
| Age, mean years (SD)                          | 24.4 (3.8)       |
| Male sex (%)                                  | 535 (43.7)       |
| Education, years                              |                  |
| < High school                                 | 52 (4.3)         |
| High school graduate                          | 257 (21.0)       |
| > High school                                 | 914 (74.7)       |
| Smoking status                                |                  |
| Never smokers                                 | 737 (60.7)       |
| Current smokers                               | 384 (31.6)       |
| Former smokers                                | 94 (7.7)         |
| Unknown                                       | 8                |
| Smoking pack-years*, mean (SD)                | 4.1 (4.4)        |
| Average cigarettes smoked per day†, mean (SD) | 10.6 (6.5)       |
| Pulmonary function, mean (SD)                 |                  |
| FEV <sub>1</sub> (milliliters)                | 3319.1 (673.5)   |
| FVC (milliliters)                             | 3956.0 (869.3)   |
| % African ancestry, mean (SD)                 | 70.5 (12.7)      |

Definition of abbreviations: FEV<sub>1</sub> = forced expiratory volume at one second; FVC = forced vital capacity.

\* among ever smokers only

† among current smokers only
