# Supplementary material for: Genetic Ancestry-Smoking Interactions and Lung Function in African Americans: A Cohort Study
Source: PubMed Central journal article supplement (PMC3380861; doi:10.1371/journal.pone.0039541), 2012-06-21
Supplement: pone.0039541.s004.pdf [file pone.0039541.s004.pdf]

**Table S3. Longitudinal association between FEV<sub>1</sub> decline, tobacco smoking and African ancestry, among African Americans participating in the CARDIA study.**

| Variable                   | FEV <sub>1</sub> (ml/yr)<br>(N=1221) |       |          |
|----------------------------|--------------------------------------|-------|----------|
|                            | Beta                                 | SE    | p-value  |
| Intercept                  | 3106.76                              | 28.16 | < 0.0001 |
| African ancestry, %        | -6.71                                | 1.19  | < 0.0001 |
| Age, year at time t        | -26.75                               | 0.84  | < 0.0001 |
| Smoking, pack-years        | -4.54                                | 1.86  | 0.01     |
| Past Smoking               | -18.71                               | 24.70 | 0.45     |
| Current Smoking            | -7.41                                | 19.77 | 0.71     |
| Age*African*Former smoker  | 0.18                                 | 0.12  | 0.12     |
| Age*African*Current smoker | 0.03                                 | 0.11  | 0.78     |

\*Linear mixed effects models are adjusted for sex, standing height, height squared, maximum achieved education, BMI, clinic site and two-way interactions between ancestry and age as well as between age and smoking status. Age, height and African ancestry are mean centered.
