# Supplementary material for: Genetic Ancestry-Smoking Interactions and Lung Function in African Americans: A Cohort Study
Source: PLoS One. 2012 Jun 21;7(6):e39541. doi: 10.1371/journal.pone.0039541 (PMC3380861; doi:10.1371/journal.pone.0039541)
Supplement: Table S2 — Number and mean ages of participants in the CARDIA study. (PDF) [file pone.0039541.s003.pdf]

**Table S2. Number and mean ages of participants in the CARDIA study.**

| Exam year | N    | Mean age (SD), year |
|-----------|------|---------------------|
| 0         | 576  | 27.7 (1.8)          |
| 2         | 760  | 28.9 (2.5)          |
| 5         | 951  | 30.4 (3.2)          |
| 10        | 1163 | 34.4 (3.8)          |
| 20        | 889  | 44.6 (3.8)          |

All subjects included were over age 25 and had pulmonary function data available at each examination year
