# Supplementary material for: Genetic Ancestry-Smoking Interactions and Lung Function in African Americans: A Cohort Study
Source: PLoS One. 2012 Jun 21;7(6):e39541. doi: 10.1371/journal.pone.0039541 (PMC3380861; doi:10.1371/journal.pone.0039541)
Supplement: Table S4 — Demographic characteristics of Health ABC African Americans lost to follow-up versus participants remaining in the study through year 10. (PDF) [file pone.0039541.s005.pdf]

**Table S4. Demographic characteristics of Health ABC African Americans lost to follow-up versus participants remaining in the study through year 10.**

| Characteristic                              | Lost to follow-up <sup>†</sup><br>(N=687) | Remaining in study<br>(N=594) | <i>P</i> value |
|---------------------------------------------|-------------------------------------------|-------------------------------|----------------|
|                                             | n (%)                                     | n (%)                         |                |
| Male sex                                    | 351 (51.1)                                | 201 (33.8)                    | < 0.01         |
| BMI (kilograms/meters <sup>2</sup> ) (SD)   | 28.2 (5.4)                                | 29.0 (5.4)                    | < 0.01         |
| Education, years                            |                                           |                               | < 0.01         |
| < High school                               | 344 (50.4)                                | 212 (35.8)                    |                |
| High school graduate                        | 194 (28.5)                                | 195 (32.9)                    |                |
| > High school                               | 144 (31.4)                                | 186 (31.4)                    |                |
| Unknown                                     |                                           | 6                             |                |
| Income, \$                                  |                                           |                               | 0.05           |
| <10,000                                     | 171 (28.1)                                | 125 (24.0)                    |                |
| 10,000 – 25,000                             | 304 (49.9)                                | 249 (47.8)                    |                |
| 25,001 – 49,999                             | 111 (18.2)                                | 114 (21.9)                    |                |
| ≥ 50,000                                    | 23 (3.8)                                  | 33 (6.3)                      |                |
| Unknown                                     |                                           | 151                           |                |
| Smoking pack-years <sup>‡</sup> , mean (SD) | 20.3 (26.4)                               | 12.3 (20.4)                   | < 0.01         |
| Pulmonary function, mean (SD)               |                                           |                               |                |
| FEV <sub>1</sub> (milliliters)              | 1898.8 (612.5)                            | 1959.2 (530.1)                | 0.07           |
| FVC (milliliters)                           | 2556.2 (759.6)                            | 2546.8 (684.5)                | 0.82           |
| % African ancestry, mean (SD)               | 79.4 (12.8)                               | 77.5 (13.4)                   | 0.01           |
| Unknown                                     |                                           | 126                           |                |

Definition of abbreviations: BMI = body mass index; FEV<sub>1</sub> = forced expiratory volume at one second; FVC = forced vital capacity.

\*Categorical and continuous variables were assessed with chi-square test and two-sample t-test, respectively.

<sup>†</sup>Lost to follow-up indicates either missing (N=70) or died (617).

<sup>‡</sup>among ever smokers only
