# Supplementary material for: Genetic Ancestry-Smoking Interactions and Lung Function in African Americans: A Cohort Study
Source: PLoS One. 2012 Jun 21;7(6):e39541. doi: 10.1371/journal.pone.0039541 (PMC3380861; doi:10.1371/journal.pone.0039541)
Supplement: Table S5 — Demographic characteristics of non-asthmatic CARDIA African Americans who were included or not included in study sample due to lack of genetic data. (PDF) [file pone.0039541.s006.pdf]

**Table S5. Demographic characteristics of non-asthmatic CARDIA African Americans who were included or not included in study sample due to lack of genetic data.**

| Characteristic                               | Not included<br>(N=830) | Included<br>(N=1223) | <i>P</i> value |
|----------------------------------------------|-------------------------|----------------------|----------------|
|                                              | n (%)                   | n (%)                |                |
| Year 0 age, mean (SD)                        | 24.1 (3.8)              | 24.4 (3.8)           | 0.17           |
| Male sex                                     | 404 (48.7)              | 535 (43.7)           | 0.03           |
| BMI (kilograms/meters <sup>2</sup> ) (SD)    | 24.9 (5.4)              | 25.3 (5.7)           | 0.17           |
| Maximum attained education, years, mean (SD) | 13.8 (3.6)              | 14.6 (4.1)           | < 0.001        |
| Smoking pack-years at Year 0, mean (SD)      | 1.8 (3.5)               | 1.7 (3.4)            | 0.30           |
| Smoking pack-years at Year 0*, mean (SD)     | 4.2 (4.1)               | 4.3 (4.4)            | 0.67           |
| Pulmonary function, mean (SD)                |                         |                      |                |
| FEV <sub>1</sub> (milliliters)               | 3322.5 (704.0)          | 3319.1 (673.5)       | 0.91           |
| FVC (milliliters)                            | 3960.7 (871.7)          | 3956.0 (869.3)       | 0.91           |

BMI denotes body mass index; FEV<sub>1</sub>, forced expiratory volume at one second; and FVC, forced vital capacity. Categorical and continuous variables were assessed with chi-square test and two-sample t-test, respectively.

\*among current smokers only
